# Supplementary material for: MicroRNA-146a is induced by inflammatory stimuli in airway epithelial cells and augments the anti-inflammatory effects of glucocorticoids
Source: PubMed Central journal article supplement (PMC6177187; doi:10.1371/journal.pone.0205434), 2018-10-09

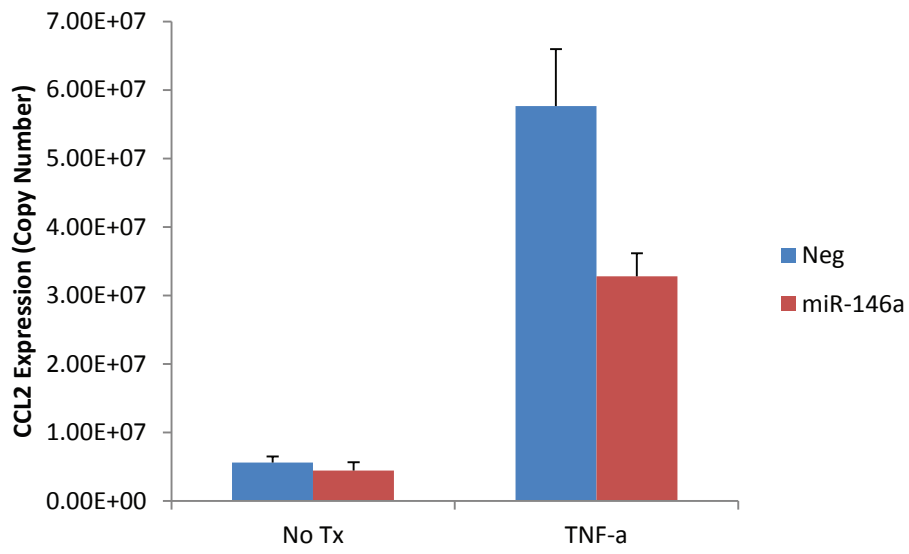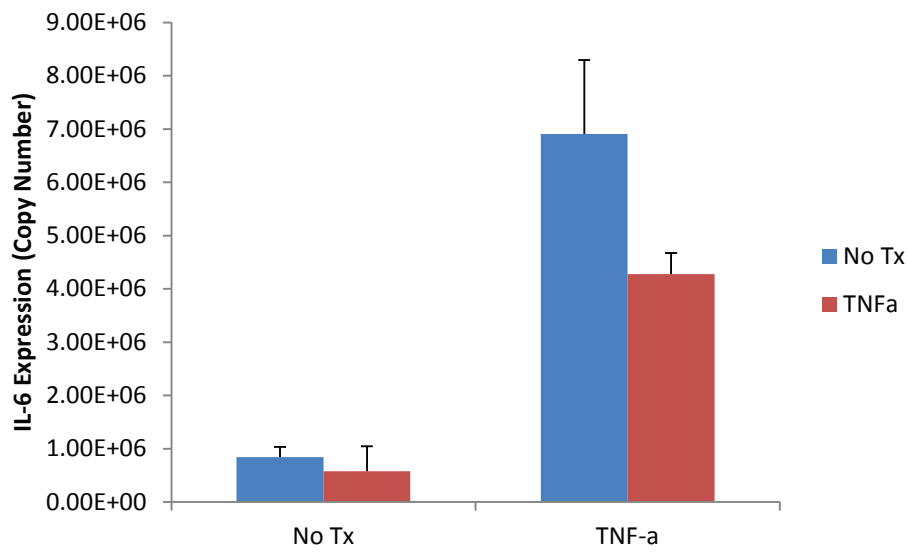

Supplement: pone.0205434.s003.pdf [file pone.0205434.s003.pdf]
